# Supplementary material for: Rapid bacteriolysis of Staphylococcus aureus by lysin exebacase
Source: PubMed Central journal article supplement (PMC10580946; doi:10.1128/spectrum.01906-23), 2023-08-10
Supplement: spectrum.01906-23-s0001.pdf [file spectrum.01906-23-s0001.pdf]

1 **Supplementary Video File Legend**

2 **Video S1.** Exponential phase MRSA strain MW2 suspended at a concentration of  $\sim 1 \times 10^8$   
3 CFU/mL in 1 ml polypropylene cuvettes and treated with either buffer (vehicle control; on left)  
4 or exebacase (32  $\mu\text{g}/\text{mL}$ ; on right) for 15 min. The resulting video is condensed into 14 sec.

5 **Video S2.** Exponential phase MSSA strain CFS 1155 suspended at a concentration of  $\sim 1 \times 10^8$   
6 CFU/mL in TSB (using 1 ml polypropylene cuvettes) and treated with exebacase (32  $\mu\text{g}/\text{mL}$ ) for  
7 15 min. The resulting video is condensed into 14 sec.

8 **Video S3.** MRSA strain MW2 (labeled with DAPI) suspended in Phosphate Buffer was treated  
9 with exebacase (1  $\mu\text{g}/\text{mL}$ ) for 2 h and fluorescence images were taken every 2 min. The  
10 resulting video was condensed into 18 sec.

11 **Video S4.** VRSA strain CFS-255 (NRS 281) labeled with DAPI and suspended in Phosphate Buffer  
12 was treated with exebacase (1  $\mu\text{g}/\text{mL}$ ) for 10 min. The resulting video was condensed into 19  
13 sec.

14 **Video S5.** VRSA strain CFS-255 (NRS 281) suspended in Phosphate Buffer and treated with  
15 exebacase (1  $\mu\text{g}/\text{mL}$ ) for 10 min. The resulting video was condensed into 7 sec.  
16
